# Supplementary material
Source: PubMed Central journal article supplement (PMC8561431)
Supplement: jamaneurol-e213926-s001.pdf [file jamaneurol-e213926-s001.pdf]

## Supplemental Online Content

Yoon SY, Suh JH, Yang SN, Han K, Kim YW. Association of physical activity with all-cause mortality in Parkinson disease. *JAMA Neurol*. Published online November 1, 2021. doi:10.1001/jamaneurol.2021.3926

**eAppendix.** Criteria for Parkinson's disease in the Registration Program for Rare Intractable Diseases

**eFigure.** Flowchart of the subject selection process

**eTable 1.** Physical Activity Status Before and After Diagnosis of Parkinson's Disease stratified by Mortality

**eTable 2.** Cox Proportional Hazard Regression Analysis of the Risk of All-Cause Mortality in Patients with Parkinson's Disease Stratified by Intensity

**eTable 3.** Subgroup Analyses of Age, Sex, Smoking, Alcohol, Comorbidities, Body Mass Index, and Disability Registration

**eTable 4.** Multivariate Cox Proportional Hazard Analyses of Covariables for All-cause Mortality in Parkinson's disease

This supplemental material has been provided by the authors to give readers additional information about their work.

## **eAppendix 1. Criteria for Parkinson's disease in the Registration Program for Rare Intractable Diseases**

- (1) bradykinesia (a score of at least 2 in the bradykinesia items of the Unified Parkinson's Disease Rating Scale) with at least one of the following features: muscle rigidity, rest tremor, and postural instability
- (2) exclusion of secondary parkinsonism such as stroke, head injury, encephalitis, hypoxic brain injury, and adverse effects of medication
- (3) three or more of the following: unilateral onset, rest tremor, disease progression, persistent asymmetry affecting the side of onset, excellent response (70–100%) to levodopa, severe levodopa-induced chorea, levodopa response for 5 years or more, and a clinical course of ten years or more

**eFigure 1.** Flowchart of the subject selection process

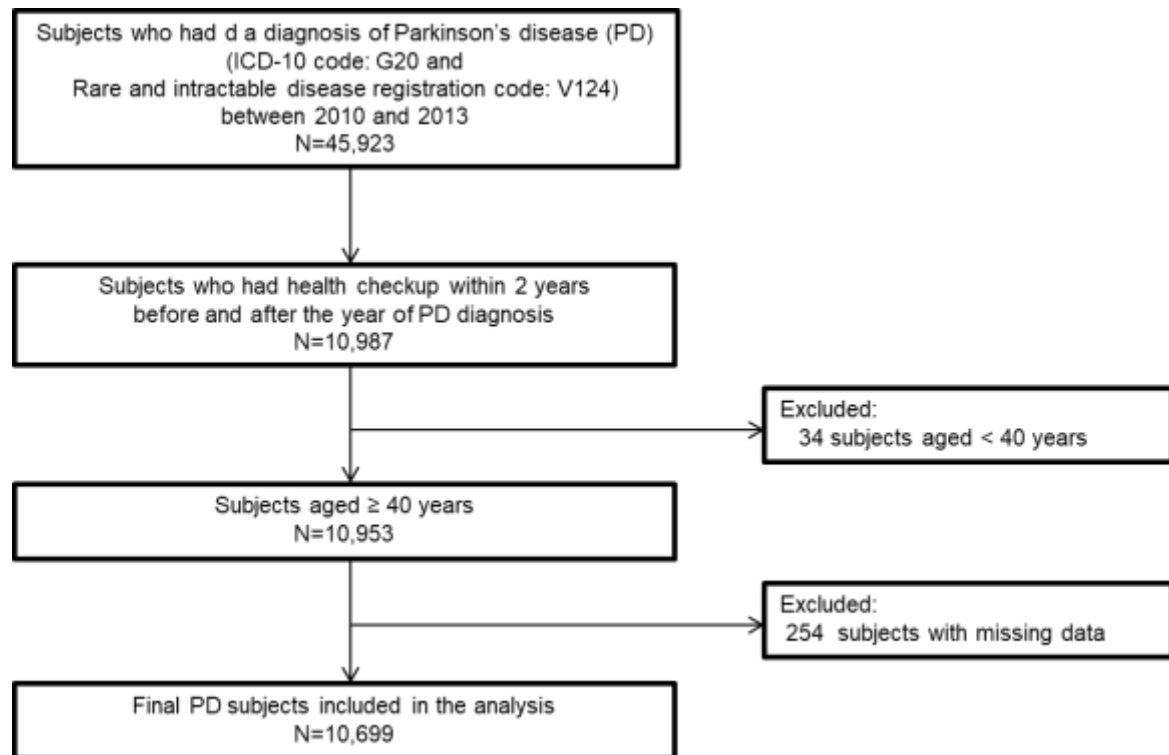

**eTable 1.** Physical Activity Status Before and After Diagnosis of Parkinson’s Disease stratified by Mortality

|                |                            | Mortality    |                |                |                |              |                |                |                |
|----------------|----------------------------|--------------|----------------|----------------|----------------|--------------|----------------|----------------|----------------|
|                |                            | No (n=8876)  |                |                |                | Yes (n=1823) |                |                |                |
|                |                            | Group 1      | Group 2        | Group 3        | Group 4        | Group 1      | Group 2        | Group 3        | Group 4        |
|                | No.                        | 2536         | 1867           | 1599           | 2874           | 690          | 306            | 398            | 429            |
| Pre-diagnosis  | Physically active subjects | 250 (9.86)   | 237 (12.69)    | 1049 (65.6)    | 2111(73.45)    | 51 (7.39)    | 43 (14.05)     | 232 (58.29)    | 287 (66.9)     |
|                | MET-min/week (Quartiles)   |              |                |                |                |              |                |                |                |
|                | Q1                         | 1613 (63.6)  | 988 (52.92)    | 0 (0)          | 0(0)           | 471 (68.26)  | 177 (57.84)    | 0 (0)          | 0 (0)          |
|                | Q2                         | 923 (36.4)   | 879 (47.08)    | 0 (0)          | 0(0)           | 219 (31.74)  | 129 (42.16)    | 0 (0)          | 0 (0)          |
|                | Q3                         | 0(0)         | 0 (0)          | 893 (55.85)    | 1306 (45.44)   | 0 (0)        | 0 (0)          | 229 (57.54)    | 200 (46.62)    |
|                | Q4                         | 0(0)         | 0 (0)          | 706 (44.15)    | 1568 (54.56)   | 0 (0)        | 0 (0)          | 169 (42.46)    | 229 (53.38)    |
|                | MET-min/week, median (IQR) | 0 (0-180)    | 0 (0-270)      | 680 (600-1200) | 835 (630-1400) | 0 (0-180)    | 0 (0-270)      | 630 (630-1140) | 800 (630-1360) |
| Post-diagnosis | Physically active subjects | 230 (9.07)   | 1213 (64.97)   | 197 (12.32)    | 2059 (71.64)   | 42 (6.09)    | 176 (57.52)    | 39 (9.8)       | 258 (60.14)    |
|                | MET-min/week (Quartiles)   |              |                |                |                |              |                |                |                |
|                | Q1                         | 1578 (62.22) | 0(0)           | 841 (52.6)     | 0 (0)          | 502 (72.75)  | 0 (0)          | 242 (60.8)     | 0 (0)          |
|                | Q2                         | 958 (37.78)  | 0(0)           | 758 (47.4)     | 0 (0)          | 188 (27.25)  | 0 (0)          | 156 (39.2)     | 0 (0)          |
|                | Q3                         | 0 (0)        | 1053 (56.4)    | 0 (0)          | 1316 (45.79)   | 0 (0)        | 193 (63.07)    | 0 (0)          | 243 (56.64)    |
|                | Q4                         | 0 (0)        | 814 (43.6)     | 0 (0)          | 1558 (54.21)   | 0 (0)        | 113 (36.93)    | 0 (0)          | 186 (43.36)    |
|                | MET-min/week, median (IQR) | 0 (0-180)    | 760 (630-1230) | 0 (0-270)      | 930 (630-1510) | 0 (0-90)     | 630 (600-1180) | 0 (0-240)      | 750 (630-1440) |

The median values of MET-min/week were 400 (90-800) and 450 (90-820) at pre-diagnosis and post-diagnosis, respectively. Subjects with PD were divided into four groups according to the median values at pre- and post-diagnosis (Group 1; <400/<450, Group 2; <400/≥450, Group 3; ≥400/<450, Group 4; ≥400/≥450).

**eTable 2.** Cox Proportional Hazard Regression Analysis of the Risk of All-Cause Mortality in Patients with Parkinson’s Disease Stratified by Intensity

| Intensity       | PD (n) | Mortality (n) | Person-Years | Mortality Rate | Model 1          | P Value | Model 2          | P Value | Model 3          | P Value |
|-----------------|--------|---------------|--------------|----------------|------------------|---------|------------------|---------|------------------|---------|
| <b>Vigorous</b> |        |               |              |                |                  |         |                  |         |                  |         |
| Active          | 8927   | 1616          | 39810.21     | 40.5926        | 1 (Ref.)         |         | 1 (Ref.)         |         | 1 (Ref.)         |         |
| Inactive        | 1772   | 207           | 8151.69      | 25.3935        | 0.62 (0.54-0.72) | <0.001  | 0.74 (0.64-0.86) | <0.001  | 0.80 (0.69-0.93) | 0.004   |
| <b>Moderate</b> |        |               |              |                |                  |         |                  |         |                  |         |
| Active          | 9445   | 1686          | 42090.96     | 40.0561        | 1 (Ref.)         |         | 1 (Ref.)         |         | 1 (Ref.)         |         |
| Inactive        | 1254   | 137           | 5870.93      | 23.3353        | 0.57 (0.48-0.68) | <0.001  | 0.63 (0.53-0.75) | <0.001  | 0.66 (0.55-0.78) | <0.001  |
| <b>Light</b>    |        |               |              |                |                  |         |                  |         |                  |         |
| Active          | 7142   | 1311          | 31892.5      | 41.1068        | 1 (Ref.)         |         | 1 (Ref.)         |         | 1 (Ref.)         |         |
| Inactive        | 3557   | 512           | 16069.39     | 31.8618        | 0.78 (0.70-0.86) | <0.001  | 0.80 (0.72-0.88) | <0.001  | 0.81 (0.73-0.90) | <0.001  |

PD, Parkinson’s disease

Mortality rate is the incidence of mortality per 1000 person-years

Model 1: unadjusted

Model 2: adjusted for age, sex, income level, and residential area

Model 3: adjusted for age, sex, income level, residential area, comorbidities, smoking, alcohol consumption, body mass index, and disability registration

**eTable 3.** Subgroup Analyses of Age, Sex, Smoking, Alcohol, Comorbidities, Body Mass Index, and Disability Registration

| Subgroup      |        | Quartile (MET-Min/Week) | PD (n) | Mortality (n) | Person-Years | Mortality Rate | HR (95% CI)       | P Value | P value for Interaction |
|---------------|--------|-------------------------|--------|---------------|--------------|----------------|-------------------|---------|-------------------------|
| Age           | <65    | Q1 (<90)                | 603    | 62            | 2821.32      | 21.9755        | 1 (Ref.)          | 0.42    | 0.32                    |
|               |        | Q2 (<450)               | 534    | 37            | 2578.35      | 14.3503        | 0.87 (0.58-1.32)  | 0.51    |                         |
|               |        | Q3 (<820)               | 814    | 75            | 3846.17      | 19.4999        | 1.07 (0.76-1.51)  | 0.70    |                         |
|               |        | Q4 (820≤)               | 1081   | 70            | 5153.51      | 13.583         | 0.82 (0.58-1.17)  | 0.28    |                         |
|               | 65≤    | Q1 (<90)                | 2560   | 682           | 10995.69     | 62.0243        | 1 (Ref.)          | <0.001  |                         |
|               |        | Q2 (<450)               | 1526   | 307           | 6672.2       | 46.0118        | 0.81 (0.71-0.92)  | <0.001  |                         |
|               |        | Q3 (<820)               | 1991   | 361           | 8697.25      | 41.5074        | 0.72 (0.63-0.82)  | <0.001  |                         |
|               |        | Q4 (820≤)               | 1590   | 229           | 7197.41      | 31.817         | 0.59 (0.50-0.69)  | <0.001  |                         |
| Sex           | Male   | Q1 (<90)                | 1243   | 399           | 5211.62      | 76.5597        | 1 (Ref.)          | <0.001  | 0.56                    |
|               |        | Q2 (<450)               | 867    | 204           | 3745.55      | 54.4646        | 0.85 (0.72-1.01)  | 0.06    |                         |
|               |        | Q3 (<820)               | 1335   | 288           | 5790.54      | 49.7363        | 0.80 (0.68-0.93)  | 0.004   |                         |
|               |        | Q4 (820≤)               | 1480   | 211           | 6821.5       | 30.9316        | 0.61 (0.52-0.73)  | <0.001  |                         |
|               | Female | Q1 (<90)                | 1920   | 345           | 8605.4       | 40.0911        | 1 (Ref.)          | <0.001  |                         |
|               |        | Q2 (<450)               | 1193   | 140           | 5504.99      | 25.4315        | 0.75 (0.62-0.92)  | 0.005   |                         |
|               |        | Q3 (<820)               | 1470   | 148           | 6752.88      | 21.9166        | 0.69 (0.57-0.84)  | <0.001  |                         |
|               |        | Q4 (820≤)               | 1191   | 88            | 5529.41      | 15.9149        | 0.60 (0.48-0.77)  | <0.001  |                         |
| Heavy drinker | No     | Q1 (<90)                | 3125   | 733           | 13650.45     | 53.6979        | 1 (Ref.)          | <0.001  | 0.40                    |
|               |        | Q2 (<450)               | 2048   | 340           | 9198.33      | 36.9632        | 0.80 (0.70-0.91)  | <0.001  |                         |
|               |        | Q3 (<820)               | 2782   | 432           | 12435.62     | 34.7389        | 0.76 (0.67-0.86)  | <0.001  |                         |
|               |        | Q4 (820≤)               | 2632   | 292           | 12174.01     | 23.9855        | 0.60 (0.52-0.69)  | <0.001  |                         |
|               | Yes    | Q1 (<90)                | 38     | 11            | 166.57       | 66.0394        | 1 (Ref.)          | 0.47    |                         |
|               |        | Q2 (<450)               | 12     | 4             | 52.21        | 76.6163        | 3.02 (0.70-13.15) | 0.14    |                         |
|               |        | Q3 (<820)               | 23     | 4             | 107.81       | 37.1039        | 0.95 (0.28-3.24)  | 0.93    |                         |
|               |        | Q4 (820≤)               | 39     | 7             | 176.91       | 39.5688        | 1.27 (0.43-3.72)  | 0.66    |                         |

|                   |     |           |      |     |          |         |                  |        |      |
|-------------------|-----|-----------|------|-----|----------|---------|------------------|--------|------|
| Current smoker    | No  | Q1 (<90)  | 2994 | 700 | 13077.26 | 53.528  | 1 (Ref.)         | <0.001 | 0.21 |
|                   |     | Q2 (<450) | 1943 | 326 | 8714.32  | 37.4097 | 0.82 (0.71-0.93) | 0.002  |      |
|                   |     | Q3 (<820) | 2652 | 403 | 11894.71 | 33.8806 | 0.74 (0.65-0.84) | <0.001 |      |
|                   |     | Q4 (820≤) | 2545 | 278 | 11761.27 | 23.6369 | 0.60 (0.52-0.69) | <0.001 |      |
|                   | Yes | Q1 (<90)  | 169  | 44  | 739.75   | 59.4793 | 1 (Ref.)         | 0.33   |      |
|                   |     | Q2 (<450) | 117  | 18  | 536.22   | 33.568  | 0.64 (0.36-1.13) | 0.12   |      |
|                   |     | Q3 (<820) | 153  | 33  | 648.71   | 50.8702 | 1.02 (0.64-1.64) | 0.92   |      |
|                   |     | Q4 (820≤) | 126  | 21  | 589.64   | 35.6147 | 0.77 (0.45-1.33) | 0.35   |      |
| Diabetes mellitus | No  | Q1 (<90)  | 2008 | 421 | 8951.65  | 47.0305 | 1 (Ref.)         | <0.001 | 0.92 |
|                   |     | Q2 (<450) | 1352 | 197 | 6167.27  | 31.9428 | 0.82 (0.70-0.97) | 0.02   |      |
|                   |     | Q3 (<820) | 1847 | 246 | 8356.12  | 29.4395 | 0.75 (0.64-0.88) | <0.001 |      |
|                   |     | Q4 (820≤) | 1921 | 185 | 8987.57  | 20.584  | 0.60 (0.50-0.72) | <0.001 |      |
|                   | Yes | Q1 (<90)  | 1155 | 323 | 4865.37  | 66.3876 | 1 (Ref.)         | <0.001 |      |
|                   |     | Q2 (<450) | 708  | 147 | 3083.27  | 47.6766 | 0.80 (0.65-0.97) | 0.02   |      |
|                   |     | Q3 (<820) | 958  | 190 | 4187.31  | 45.3752 | 0.77 (0.64-0.92) | 0.004  |      |
|                   |     | Q4 (820≤) | 750  | 114 | 3363.34  | 33.8949 | 0.61 (0.49-0.76) | <0.001 |      |
| Hypertension      | No  | Q1 (<90)  | 1325 | 306 | 5742.88  | 53.2834 | 1 (Ref.)         | <0.001 | 0.08 |
|                   |     | Q2 (<450) | 894  | 145 | 4010.04  | 36.1593 | 0.82 (0.67-1.00) | 0.05   |      |
|                   |     | Q3 (<820) | 1277 | 187 | 5768.14  | 32.4195 | 0.73 (0.61-0.88) | 0.001  |      |
|                   |     | Q4 (820≤) | 1345 | 120 | 6227.53  | 19.2693 | 0.49 (0.39-0.61) | <0.001 |      |
|                   | Yes | Q1 (<90)  | 1838 | 438 | 8074.14  | 54.2473 | 1 (Ref.)         | <0.001 |      |
|                   |     | Q2 (<450) | 1166 | 199 | 5240.51  | 37.9734 | 0.79 (0.67-0.94) | 0.007  |      |
|                   |     | Q3 (<820) | 1528 | 249 | 6775.28  | 36.7512 | 0.78 (0.67-0.91) | 0.002  |      |
|                   |     | Q4 (820≤) | 1326 | 179 | 6123.38  | 29.2322 | 0.71 (0.59-0.85) | <0.001 |      |
| Dyslipidemia      | No  | Q1 (<90)  | 1619 | 416 | 7110.37  | 58.5061 | 1 (Ref.)         | <0.001 | 0.69 |
|                   |     | Q2 (<450) | 1027 | 188 | 4637.23  | 40.5415 | 0.83 (0.69-0.98) | 0.03   |      |

|                         |     |           |      |     |          |         |                  |        |      |
|-------------------------|-----|-----------|------|-----|----------|---------|------------------|--------|------|
|                         |     | Q3 (<820) | 1456 | 244 | 6544.46  | 37.2835 | 0.76 (0.64-0.89) | <0.001 |      |
|                         |     | Q4 (820≤) | 1522 | 168 | 7139.64  | 23.5306 | 0.58 (0.48-0.69) | <0.001 |      |
|                         | Yes | Q1 (<90)  | 1544 | 328 | 6706.65  | 48.9067 | 1 (Ref.)         | <0.001 |      |
|                         |     | Q2 (<450) | 1033 | 156 | 4613.32  | 33.8152 | 0.78 (0.64-0.94) | 0.01   |      |
|                         |     | Q3 (<820) | 1349 | 192 | 5998.96  | 32.0055 | 0.76 (0.63-0.91) | 0.002  |      |
|                         |     | Q4 (820≤) | 1149 | 131 | 5211.27  | 25.1378 | 0.65 (0.53-0.80) | <0.001 |      |
| Body mass index         | <25 | Q1 (<90)  | 2142 | 557 | 9195.75  | 60.5715 | 1 (Ref.)         | <0.001 | 0.55 |
|                         |     | Q2 (<450) | 1362 | 262 | 6023.28  | 43.4979 | 0.85 (0.73-0.98) | 0.03   |      |
|                         |     | Q3 (<820) | 1845 | 310 | 8227.08  | 37.6804 | 0.76 (0.66-0.87) | <0.001 |      |
|                         |     | Q4 (820≤) | 1789 | 218 | 8229.99  | 26.4885 | 0.64 (0.54-0.75) | <0.001 |      |
|                         | 25≤ | Q1 (<90)  | 1021 | 187 | 4621.26  | 40.4651 | 1 (Ref.)         | <0.001 |      |
|                         |     | Q2 (<450) | 698  | 82  | 3227.27  | 25.4085 | 0.70 (0.54-0.91) | 0.008  |      |
|                         |     | Q3 (<820) | 960  | 126 | 4316.34  | 29.1914 | 0.80 (0.64-1.01) | 0.06   |      |
|                         |     | Q4 (820≤) | 882  | 81  | 4120.93  | 19.6558 | 0.56 (0.43-0.74) | <0.001 |      |
| Disability registration | No  | Q1 (<90)  | 2935 | 651 | 12873.21 | 50.5701 | 1(Ref.)          | <.001  | 0.31 |
|                         |     | Q2 (<450) | 1942 | 302 | 8719.2   | 34.6362 | 0.79 (0.69-0.91) | <.001  |      |
|                         |     | Q3 (<820) | 2676 | 405 | 11915.35 | 33.9898 | 0.77 (0.68-0.88) | <.001  |      |
|                         |     | Q4 (820≤) | 2551 | 264 | 11784.88 | 22.4016 | 0.61 (0.52-0.70) | <.001  |      |
|                         | Yes | Q1 (<90)  | 228  | 93  | 943.81   | 98.5373 | 1(Ref.)          | 0.023  |      |
|                         |     | Q2 (<450) | 118  | 42  | 531.34   | 79.0455 | 0.88 (0.61-1.29) | 0.52   |      |
|                         |     | Q3 (<820) | 129  | 31  | 628.07   | 49.3575 | 0.55 (0.36-0.84) | 0.006  |      |
|                         |     | Q4 (820≤) | 120  | 35  | 566.03   | 61.8342 | 0.66 (0.44-0.98) | 0.041  |      |

CI, confidence interval; HR, hazard ratio; MET, metabolic equivalent task; PD, Parkinson's disease



**eTable 4.** Multivariate Cox Proportional Hazard Analyses of Covariables for All-cause Mortality in Parkinson's disease

| <b>Variables</b>                     | <b>HR (95% CI)</b> | <b>P value</b> |
|--------------------------------------|--------------------|----------------|
| Age                                  | 1.07 (1.06-1.07)   | <0.001         |
| Sex (reference=male)                 | 0.53 (0.48-0.58)   | <0.001         |
| Residential area (reference=urban)   | 1.09 (0.99-1.20)   | 0.08           |
| Disability registration              | 1.92 (1.66-2.23)   | <0.001         |
| Comorbidities                        |                    |                |
| Charlson comorbidity index           | 1.13 (1.11-1.16)   | <0.001         |
| Diabetes mellitus                    | 1.09 (0.96-1.23)   | 0.03           |
| Hypertension                         | 0.93 (0.85-1.03)   | 0.17           |
| Dyslipidemia                         | 0.82 (0.74-0.90)   | <0.001         |
| Current smoker                       | 0.98 (0.81-1.19)   | 0.87           |
| Heavy drinker                        | 1.42 (0.96-2.10)   | 0.08           |
| Body mass index (kg/m <sup>2</sup> ) | 0.94 (0.92-0.95)   | <0.001         |
